# Supplementary material for: DNA Methylation on N6-Adenine Regulates the Hyphal Development During Dimorphism in the Early-Diverging Fungus <em>Mucor lusitanicus</em>
Source: Preprints.org preprint supplement (doi:10.20944/preprints202107.0525.v1), 2021-07-23
Supplement: Supplementary file 3 [file Supplementary Information_Osorio-Concepcion et al_Figure S3.docx]

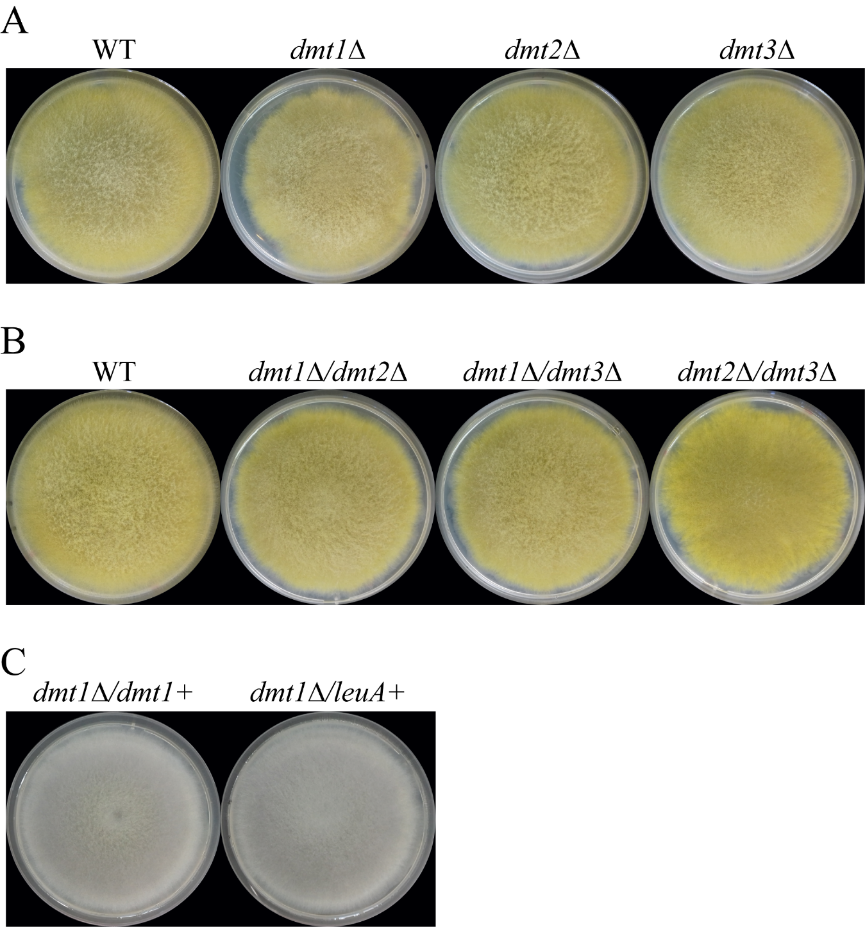


**Figure S3.** Phenotypic analysis of *dmt* mutants and complemented strains.Small pieces of mycelium from the wild-type strains (WT) MU636 (A) and CBS277.49 (B), single deletion mutants (A), double deletion mutants (B), strains complemented with *dmt1* gene (MU1331) or containing only the *leu*A marker (MU1334) were inoculated at the center of the plate containing solid YPG medium, pH 4.5, and grown for 96 h at 26ºC. Strains complemented in C were albino due to the deletion of the *carRP* locus after homologous recombination with the complementation cassettes
