# Supplementary material for: DNA Methylation on N6-Adenine Regulates the Hyphal Development During Dimorphism in the Early-Diverging Fungus <em>Mucor lusitanicus</em>
Source: Preprints.org preprint supplement (doi:10.20944/preprints202107.0525.v1), 2021-07-23
Supplement: Supplementary file 4 [file Supplementary Information_Osorio-Concepcion et al_Figure S4.docx]

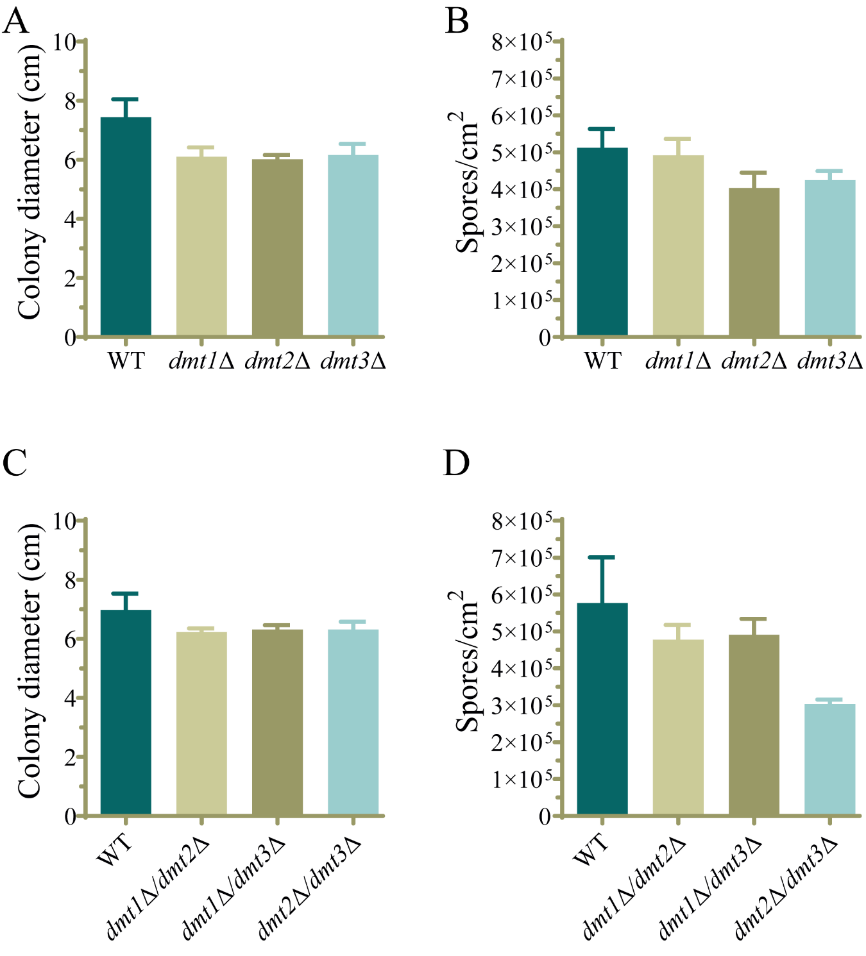


**Fig S4**. Single and double deletion mutants in the *dmt* genes are not affected in the growth and sporulation. A and C) Colony diameter of the wild-type (WT), *dmt1∆* (MU1317), *dmt2∆* (MU1318), *dmt3∆* (MU1320), *dmt1∆/dmt2∆* (MU1326), *dmt1∆/dmt3∆* (MU1326), and *dmt2∆/dmt3∆* (MU1330) strains grown for 72 h was measured. B and D) Spore production of each strain cultured on solid YPG medium, pH 4.5, was determined counting the spore number harvested 96 h of growth in 12 h light/dark cycles at 26ºC. The graphs display means ± SD. Three independent experiments were conducted for each strain. The wild-type strains are MU636 (A and B) and CBS277.49 (C and D).
