# Supplementary material for: DNA Methylation on N6-Adenine Regulates the Hyphal Development During Dimorphism in the Early-Diverging Fungus <em>Mucor lusitanicus</em>
Source: Preprints.org preprint supplement (doi:10.20944/preprints202107.0525.v1), 2021-07-23
Supplement: Supplementary file 5 [file Supplementary Information_Osorio-Concepcion et al_Figure S5.docx]

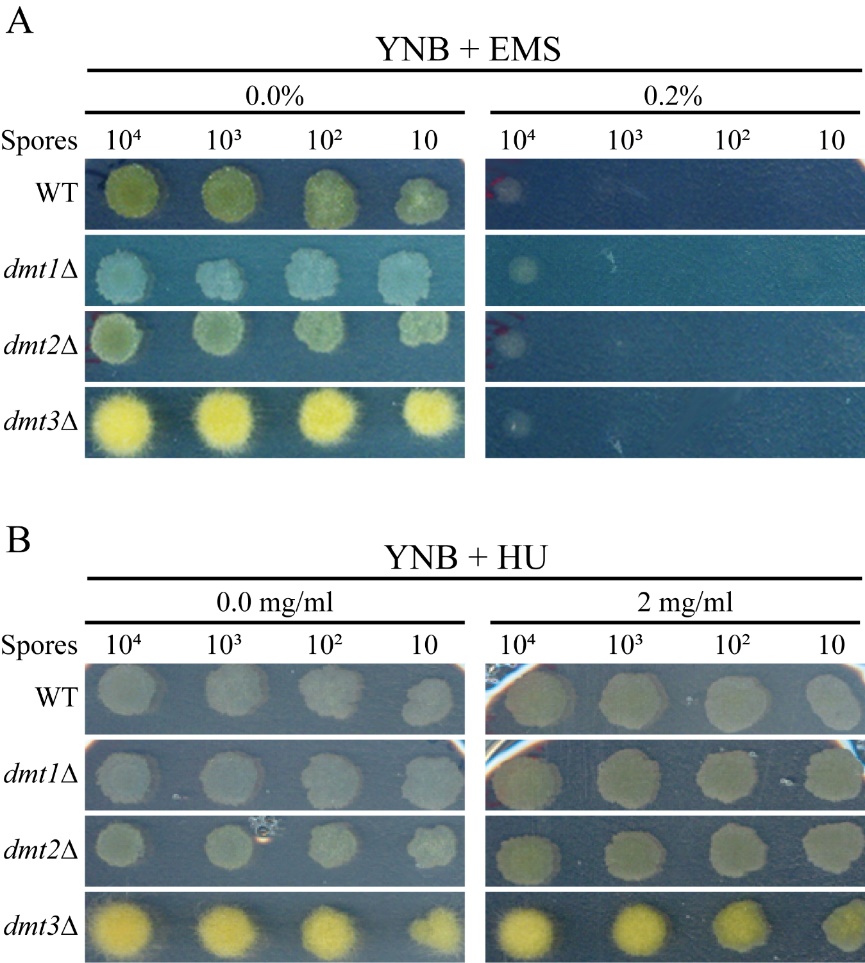


**Figure S5**. Phenotypic analysis of single deletion mutants in the *dmt1*, *dmt2,* and *dmt3* genes exposed to alkylating agents and compounds inhibiting DNA synthesis. The indicated amount of fresh spores of wild-type strain MU636 (WT) and *dmt* mutants were spotted on YNB agar plates, pH 3, amended with 0.2% EMS (A) or 2 mg/ml HU (B), and grown for 48 h at 26ºC. Three independent experiments were conducted for each strain.
