# Supplementary material for: DNA Methylation on N6-Adenine Regulates the Hyphal Development During Dimorphism in the Early-Diverging Fungus <em>Mucor lusitanicus</em>
Source: Preprints.org preprint supplement (doi:10.20944/preprints202107.0525.v1), 2021-07-23
Supplement: Supplementary file 6 [file Supplementary Information_Osorio-Concepcion et al_Figure S6.docx]

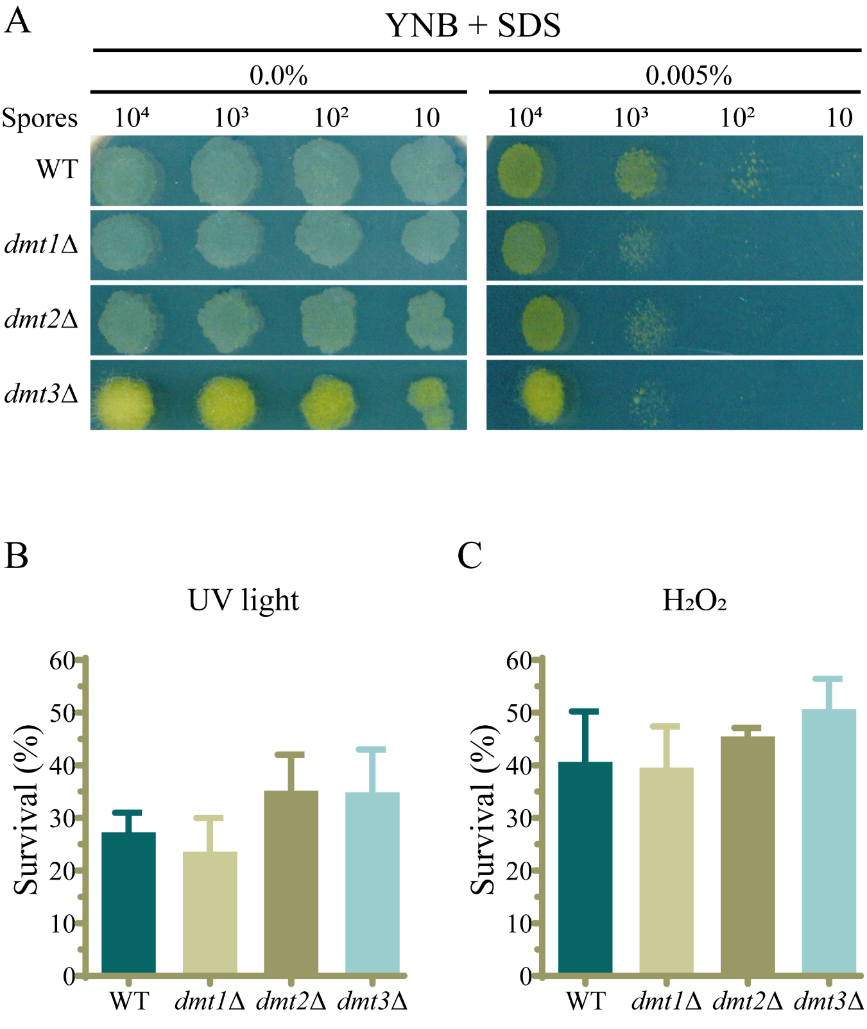


**Fig S6**. Survival analysis of single deletion mutants in the *dmt1*, *dmt2,* and *dmt3* genes exposed to stress generating compounds and DNA damaging agents. A) Different amounts of fresh spores *dmt* knockout mutants and the wild type strain MU636 (WT) were spotted on YNB agar plates, pH 3, amended with 0.005% SDS, and grown for 48 h at 26°C. B y C) For UV-associated assays and Hydrogen peroxide (H2O2), 200 spores were seeded on YNB plates, pH 3, supplemented with exposed to 10 mJ/cm2 UV, or 5 mM H2O2, respectively. All the cultures were incubated for 48 h at 26°C, and the ability to develop colonies and the survival percentage were determined. The graphs display means ± SD. Three independent experiments were conducted.
