# Supplementary material for: DNA Methylation on N6-Adenine Regulates the Hyphal Development During Dimorphism in the Early-Diverging Fungus <em>Mucor lusitanicus</em>
Source: Preprints.org preprint supplement (doi:10.20944/preprints202107.0525.v1), 2021-07-23
Supplement: Supplementary file 7 [file Supplementary Information_Osorio-Concepcion et al_Table S1.docx]

Supplementary Table S1. Mutants generated in this study

| Name | Genotype |
| --- | --- |
| MU1316 | *dmt1Δ::pyrG+, leuA-* |
| MU1317 | *dmt1Δ::pyrG+, leuA-* |
| MU1318 | *dmt2Δ::pyrG+, leuA-* |
| MU1319 | *dm2Δ::pyrG+, leuA-* |
| MU1320 | *dmt3Δ::pyrG+, leuA-* |
| MU1321 | *dmt3Δ::pyrG+, leuA-* |
| MU1322 | *dmt1Δ::pyrG+, dmt3Δ::leuA+* |
| MU1324 | *dmt1Δ::pyrG+, dmt3Δ:: leuA+* |
| MU1325 | *dmt1Δ::pyrG+, dmt2Δ::leuA+* |
| MU1326 | *dmt1Δ::pyrG+, dmt2Δ::leuA+* |
| MU1328 | *dmt2Δ::pyrG+, dmt3Δ:: leuA+* |
| MU1330 | *dmt2Δ::pyrG+, dmt3Δ::leuA+* |
| MU1331 | *dmt1Δ::pyrG+, carRPΔ::leuA+, dmt1+* |
| MU1334 | *dmt1Δ::pyrG+, carRPΔ::leuA+* |
